# Supplementary material for: Effect of Na versus Ca Sulfate Salts on the Hydration of Calcium Sulfoaluminate Clinker
Source: MDPI journal article supplement (doi:10.3390/molecules28227651), 2023-11-18
Supplement: s1 [file s1]

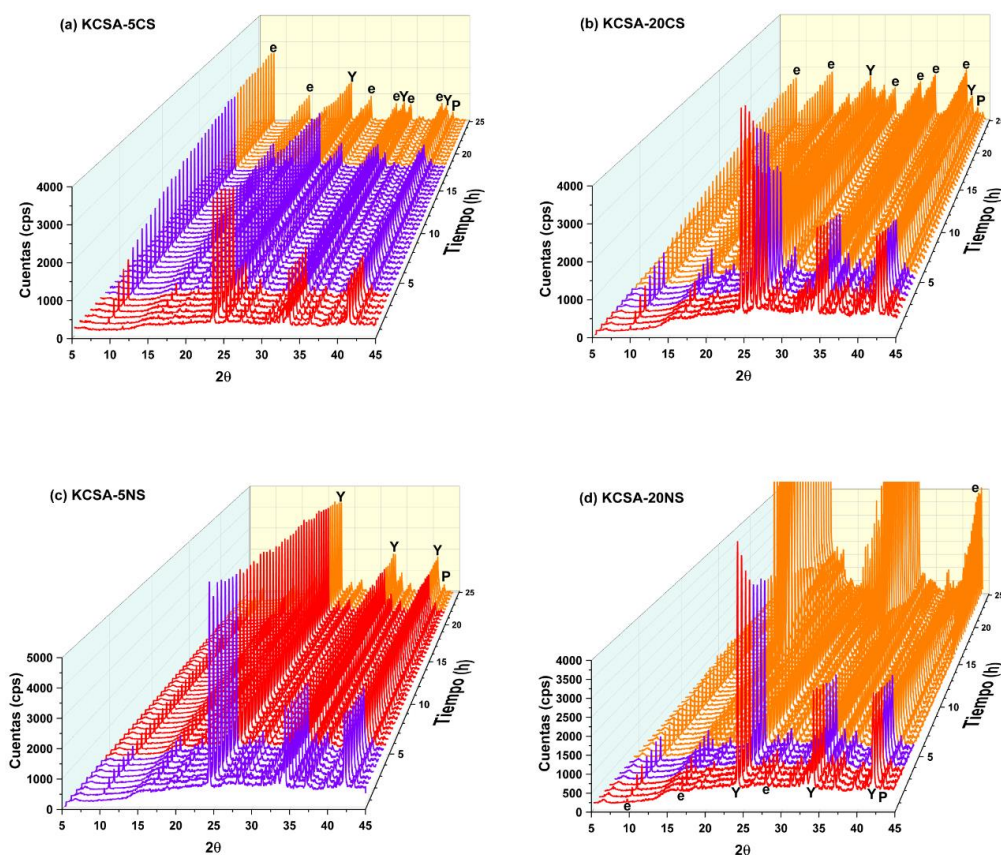

**Figure S1.** Continuous XRD diffractograms for the KCSA pastes with each of the salts.

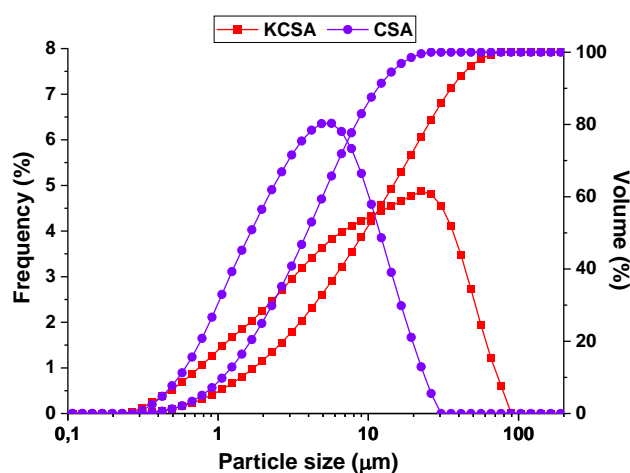

**Figure S2.** KCSA particle size.
